# Supplementary material for: Validity and reproducibility of a food frequency questionnaire assessing food group intake in the PERSIAN Cohort Study
Source: PubMed Central journal article supplement (PMC10436288; doi:10.3389/fnut.2023.1059870), 2023-08-04
Supplement: Data_Sheet_1.pdf [file Data_Sheet_1.pdf]

## **SUPPLEMENTARY MATERIAL DESCRIPTIONS**

Gender-specific analysis of correlation coefficients regarding the validity and reproducibility of the PERSIAN Cohort FFQ are provided in the following three tables.

Abbreviations:

FFQ: Food Frequency Questionnaire

24 h: 24-hour dietary recall

**Supplementary Table 1. Crude, energy-adjusted and de-attenuated energy-adjusted Spearman Correlation Coefficients comparing FFQ1, FFQ2 and mean of FFQ1 and FFQ2 with the 24 h in men**

| Food Groups       | FFQ1 vs. 24 h |                 |                                 | FFQ2 vs. 24 h |                 |                                 | FFQ1&2 vs. 24 h |                 |                                 |
|-------------------|---------------|-----------------|---------------------------------|---------------|-----------------|---------------------------------|-----------------|-----------------|---------------------------------|
|                   | Crude         | Energy-Adjusted | De-attenuated energy - adjusted | Crude         | Energy-Adjusted | De-attenuated energy - adjusted | Crude           | Energy-Adjusted | De-attenuated energy - adjusted |
| Whole Grains      | 0.51          | 0.52            | 0.59                            | 0.50          | 0.53            | 0.60                            | 0.47            | 0.49            | 0.56                            |
| Refined Grains    | 0.72          | 0.60            | 0.81                            | 0.69          | 0.51            | 0.68                            | 0.76            | 0.60            | 0.81                            |
| Legumes           | 0.28          | 0.24            | 0.27                            | 0.33          | 0.27            | 0.31                            | 0.36            | 0.31            | 0.36                            |
| Fish              | 0.25          | 0.24            | 0.27                            | 0.38          | 0.39            | 0.44                            | 0.35            | 0.35            | 0.39                            |
| Red Meat          | 0.43          | 0.39            | 0.49                            | 0.50          | 0.45            | 0.56                            | 0.50            | 0.45            | 0.56                            |
| Processed Meat    | 0.43          | 0.43            | 0.5                             | 0.44          | 0.45            | 0.53                            | 0.46            | 0.47            | 0.55                            |
| Chicken           | 0.44          | 0.35            | 0.49                            | 0.53          | 0.47            | 0.66                            | 0.55            | 0.48            | 0.67                            |
| Eggs              | 0.42          | 0.37            | 0.45                            | 0.46          | 0.44            | 0.53                            | 0.49            | 0.45            | 0.55                            |
| Other Meat        | 0.23          | 0.22            | 0.25                            | 0.26          | 0.24            | 0.28                            | 0.26            | 0.25            | 0.29                            |
| Pizza             | 0.28          | 0.29            | 0.35                            | 0.25          | 0.25            | 0.3                             | 0.28            | 0.29            | 0.35                            |
| Cheese            | 0.46          | 0.47            | 0.56                            | 0.53          | 0.54            | 0.65                            | 0.54            | 0.57            | 0.68                            |
| Dairy             | 0.47          | 0.45            | 0.54                            | 0.61          | 0.55            | 0.66                            | 0.61            | 0.59            | 0.71                            |
| Vegetables        | 0.55          | 0.45            | 0.54                            | 0.58          | 0.56            | 0.67                            | 0.63            | 0.58            | 0.70                            |
| Fresh Fruit Juice | 0.27          | 0.28            | 0.32                            | 0.19          | 0.19            | 0.21                            | 0.25            | 0.26            | 0.29                            |
| Fruit             | 0.41          | 0.45            | 0.56                            | 0.43          | 0.51            | 0.63                            | 0.46            | 0.54            | 0.67                            |
| Dried Fruit       | 0.39          | 0.42            | 0.52                            | 0.37          | 0.36            | 0.44                            | 0.41            | 0.42            | 0.52                            |
| Solid Fats        | 0.58          | 0.55            | 0.68                            | 0.71          | 0.69            | 0.86                            | 0.72            | 0.69            | 0.86                            |
| Oils              | 0.49          | 0.52            | 0.66                            | 0.59          | 0.60            | 0.76                            | 0.59            | 0.62            | 0.79                            |
| Olives            | 0.34          | 0.34            | 0.43                            | 0.47          | 0.48            | 0.61                            | 0.44            | 0.45            | 0.57                            |
| Nuts and Seeds    | 0.58          | 0.56            | 0.65                            | 0.53          | 0.51            | 0.59                            | 0.60            | 0.58            | 0.67                            |
| Sugar             | 0.68          | 0.66            | 0.85                            | 0.68          | 0.62            | 0.80                            | 0.74            | 0.73            | 0.94                            |
| Sweets            | 0.40          | 0.47            | 0.55                            | 0.31          | 0.37            | 0.44                            | 0.37            | 0.44            | 0.52                            |
| Sweetened Drinks  | 0.49          | 0.49            | 0.63                            | 0.55          | 0.58            | 0.74                            | 0.55            | 0.57            | 0.73                            |
| Tea               | 0.66          | 0.64            | 0.81                            | 0.72          | 0.66            | 0.83                            | 0.76            | 0.75            | 0.95                            |
| Salty Snacks      | 0.33          | 0.32            | 0.38                            | 0.29          | 0.29            | 0.35                            | 0.31            | 0.31            | 0.37                            |
| Salt              | 0.37          | 0.34            | 0.42                            | 0.38          | 0.38            | 0.47                            | 0.45            | 0.43            | 0.53                            |

**Supplementary Table 2. Crude, energy-adjusted and de-attenuated energy-adjusted Spearman Correlation Coefficients comparing FFQ1, FFQ2 and mean of FFQ1 and FFQ2 with the 24 h in women**

| Food Groups       | FFQ1 vs. 24 h |                 |                                 | FFQ2 vs. 24 h |                 |                                | FFQ1&2 vs. 24 h |                 |                                |
|-------------------|---------------|-----------------|---------------------------------|---------------|-----------------|--------------------------------|-----------------|-----------------|--------------------------------|
|                   | Crude         | Energy-Adjusted | De-attenuated energy - adjusted | Crude         | Energy-Adjusted | De-attenuated energy- adjusted | Crude           | Energy-Adjusted | De-attenuated energy- adjusted |
| Whole Grains      | 0.53          | 0.50            | 0.57                            | 0.52          | 0.50            | 0.57                           | 0.54            | 0.52            | 0.59                           |
| Refined Grains    | 0.61          | 0.50            | 0.67                            | 0.57          | 0.49            | 0.66                           | 0.65            | 0.53            | 0.71                           |
| Legumes           | 0.25          | 0.23            | 0.26                            | 0.39          | 0.37            | 0.42                           | 0.34            | 0.33            | 0.38                           |
| Fish              | 0.34          | 0.35            | 0.39                            | 0.33          | 0.35            | 0.39                           | 0.37            | 0.38            | 0.43                           |
| Red Meat          | 0.45          | 0.46            | 0.57                            | 0.50          | 0.51            | 0.63                           | 0.50            | 0.51            | 0.63                           |
| Processed Meat    | 0.33          | 0.33            | 0.39                            | 0.34          | 0.34            | 0.40                           | 0.36            | 0.36            | 0.42                           |
| Chicken           | 0.41          | 0.36            | 0.51                            | 0.48          | 0.43            | 0.60                           | 0.51            | 0.46            | 0.65                           |
| Eggs              | 0.43          | 0.41            | 0.50                            | 0.46          | 0.43            | 0.52                           | 0.52            | 0.50            | 0.61                           |
| Other Meat        | 0.21          | 0.21            | 0.24                            | 0.31          | 0.30            | 0.35                           | 0.28            | 0.28            | 0.32                           |
| Pizza             | 0.25          | 0.25            | 0.30                            | 0.33          | 0.34            | 0.41                           | 0.31            | 0.32            | 0.39                           |
| Cheese            | 0.49          | 0.46            | 0.55                            | 0.61          | 0.59            | 0.71                           | 0.61            | 0.59            | 0.71                           |
| Dairy             | 0.51          | 0.46            | 0.56                            | 0.55          | 0.55            | 0.66                           | 0.61            | 0.58            | 0.7                            |
| Vegetables        | 0.49          | 0.39            | 0.47                            | 0.49          | 0.50            | 0.60                           | 0.57            | 0.53            | 0.64                           |
| Fresh Fruit Juice | 0.26          | 0.27            | 0.30                            | 0.31          | 0.30            | 0.34                           | 0.32            | 0.33            | 0.37                           |
| Fruit             | 0.44          | 0.42            | 0.52                            | 0.46          | 0.48            | 0.60                           | 0.49            | 0.50            | 0.62                           |
| Dried Fruit       | 0.39          | 0.41            | 0.50                            | 0.44          | 0.46            | 0.57                           | 0.47            | 0.52            | 0.64                           |
| Solid Fats        | 0.62          | 0.60            | 0.75                            | 0.69          | 0.68            | 0.85                           | 0.73            | 0.71            | 0.88                           |
| Oils              | 0.58          | 0.58            | 0.74                            | 0.71          | 0.70            | 0.89                           | 0.70            | 0.69            | 0.88                           |
| Olives            | 0.35          | 0.36            | 0.46                            | 0.39          | 0.40            | 0.51                           | 0.38            | 0.39            | 0.50                           |
| Nuts and Seeds    | 0.51          | 0.49            | 0.57                            | 0.46          | 0.42            | 0.49                           | 0.51            | 0.48            | 0.56                           |
| Sugar             | 0.65          | 0.61            | 0.78                            | 0.74          | 0.68            | 0.87                           | 0.75            | 0.71            | 0.91                           |
| Sweets            | 0.37          | 0.40            | 0.47                            | 0.38          | 0.40            | 0.47                           | 0.39            | 0.42            | 0.50                           |
| Sweetened Drinks  | 0.50          | 0.50            | 0.64                            | 0.50          | 0.50            | 0.64                           | 0.52            | 0.52            | 0.67                           |
| Tea               | 0.68          | 0.62            | 0.78                            | 0.74          | 0.66            | 0.83                           | 0.78            | 0.71            | 0.89                           |
| Salty Snacks      | 0.32          | 0.31            | 0.37                            | 0.32          | 0.30            | 0.36                           | 0.35            | 0.34            | 0.41                           |
| Salt              | 0.36          | 0.29            | 0.36                            | 0.43          | 0.34            | 0.42                           | 0.47            | 0.37            | 0.46                           |

**Supplementary Table 3. Reproducibility assessed by Intraclass Correlation Coefficients (ICC), comparing FFQ1 and FFQ2 in men and women**

| Food Groups       | Men                |                             | Women              |                             |
|-------------------|--------------------|-----------------------------|--------------------|-----------------------------|
|                   | Crude ICC (95% CI) | Energy-Adjusted ICC (95%CI) | Crude ICC (95% CI) | Energy-Adjusted ICC (95%CI) |
| Whole Grains      | 0.61 (0.52-0.69)   | 0.67 (0.6-0.73)             | 0.64 (0.57-0.7)    | 0.62 (0.55-0.68)            |
| Refined Grains    | 0.72 (0.66-0.78)   | 0.7 (0.63-0.76)             | 0.75 (0.7-0.79)    | 0.67 (0.61-0.73)            |
| Legumes           | 0.45 (0.32-0.56)   | 0.43 (0.3-0.54)             | 0.38 (0.26-0.48)   | 0.41 (0.3-0.51)             |
| Fish              | 0.55 (0.44-0.64)   | 0.54 (0.44-0.63)            | 0.56 (0.47-0.63)   | 0.52 (0.42-0.6)             |
| Red Meat          | 0.6 (0.51-0.68)    | 0.61 (0.52-0.68)            | 0.5 (0.41-0.58)    | 0.59 (0.51-0.65)            |
| Processed Meat    | 0.53 (0.42-0.62)   | 0.54 (0.43-0.62)            | 0.52 (0.43-0.6)    | 0.64 (0.57-0.7)             |
| Chicken           | 0.69 (0.62-0.75)   | 0.61 (0.52-0.68)            | 0.7 (0.64-0.75)    | 0.67 (0.61-0.73)            |
| Eggs              | 0.47 (0.35-0.57)   | 0.54 (0.43-0.63)            | 0.56 (0.48-0.63)   | 0.53 (0.44-0.6)             |
| Other Meat        | 0.66 (0.59-0.73)   | 0.61 (0.52-0.68)            | 0.43 (0.32-0.52)   | 0.47 (0.36-0.55)            |
| Pizza             | 0.61 (0.51-0.68)   | 0.7 (0.63-0.76)             | 0.49 (0.38-0.57)   | 0.49 (0.39-0.57)            |
| Cheese            | 0.48 (0.36-0.58)   | 0.57 (0.47-0.65)            | 0.57 (0.48-0.64)   | 0.6 (0.53-0.67)             |
| Dairy             | 0.74 (0.67-0.79)   | 0.69 (0.62-0.75)            | 0.64 (0.57-0.7)    | 0.65 (0.58-0.7)             |
| Vegetables        | 0.73 (0.67-0.78)   | 0.66 (0.58-0.72)            | 0.54 (0.46-0.62)   | 0.55 (0.46-0.62)            |
| Fresh Fruit Juice | 0.35 (0.2-0.47)    | 0.39 (0.24-0.5)             | 0.43 (0.32-0.52)   | 0.57 (0.49-0.64)            |
| Fruit             | 0.69 (0.62-0.75)   | 0.7 (0.63-0.76)             | 0.3 (0.56-0.69)    | 0.66 (0.6-0.72)             |
| Dried Fruit       | 0.66 (0.58-0.73)   | 0.57 (0.47-0.65)            | 0.55 (0.47-0.62)   | 0.53 (0.44-0.61)            |
| Solid Fats        | 0.66 (0.58-0.72)   | 0.62 (0.53-0.69)            | 0.68 (0.62-0.73)   | 0.72 (0.67-0.77)            |
| Oils              | 0.62 (0.53-0.69)   | 0.62 (0.53-0.69)            | 0.6 (0.53-0.67)    | 0.62 (0.54-0.68)            |
| Olives            | 0.6 (0.51-0.68)    | 0.63 (0.55-0.7)             | 0.58 (0.5-0.65)    | 0.58 (0.5-0.65)             |
| Nuts and Seeds    | 0.61 (0.52-0.69)   | 0.61 (0.52-0.69)            | 0.52 (0.43-0.6)    | 0.58 (0.5-0.65)             |
| Sugar             | 0.73 (0.66-0.78)   | 0.72 (0.66-0.78)            | 0.72 (0.68-0.77)   | 0.72 (0.67-0.77)            |
| Sweets            | 0.56 (0.46-0.64)   | 0.6 (0.5-0.67)              | 0.62 (0.54-0.68)   | 0.64 (0.57-0.7)             |
| Sweetened Drinks  | 0.74 (0.68-0.79)   | 0.74 (0.67-0.79)            | 0.63 (0.56-0.69)   | 0.69 (0.63-0.74)            |
| Tea               | 0.62 (0.54-0.7)    | 0.59 (0.49-0.66)            | 0.68 (0.62-0.73)   | 0.76 (0.72-0.8)             |
| Salty Snacks      | 0.81 (0.76-0.84)   | 0.71 (0.65-0.77)            | 0.4 (0.28-0.5)     | 0.35 (0.23-0.46)            |
| Salt              | 0.55 (0.45-0.64)   | 0.48 (0.36-0.58)            | 0.46 (0.36-0.55)   | 0.47 (0.37-0.55)            |
